# Supplementary material for: Do personal stories make patient decision aids more effective? A critical review of theory and evidence
Source: PubMed Central journal article supplement (PMC4044102; doi:10.1186/1472-6947-13-s2-s9), 2013-11-29
Supplement: 1472-6947-13-S2-S9-S2.pdf [file 1472-6947-13-S2-S9-S2.pdf]

**Table S2. Characteristics of Personal Stories used in Reviewed Studies**

| <b>Authors, Year, Citation Number</b>  | <b>Story Content</b>                                                                                                        | <b>Integration of Story in PtDA</b>                                                                                                                     | <b>Other Features</b>                                                                                                                                                                                                                                                                         | <b>Experimental Groups</b>                                                                                                                                                      |
|----------------------------------------|-----------------------------------------------------------------------------------------------------------------------------|---------------------------------------------------------------------------------------------------------------------------------------------------------|-----------------------------------------------------------------------------------------------------------------------------------------------------------------------------------------------------------------------------------------------------------------------------------------------|---------------------------------------------------------------------------------------------------------------------------------------------------------------------------------|
| Dillard et al. (2010) [1]              | Patient story described one individual's experience of deciding about screening; no additional factual information          | Patient story integrated into standard information in 4 sections focusing on: feeling uncertain about the decision; barriers to screening; impact bias. | Photograph of narrator matched to participants' sex, age and race.<br>Information obtained from National Cancer Institute online booklet                                                                                                                                                      | 2x2 design:<br>Patient story (present or absent)<br>versus<br>Screening type (colonoscopy or virtual colonoscopy).                                                              |
| Volandes et al. (2009a, b; 2011) [2-4] | Dementia patient shown as unable to communicate, in a wheelchair, unable to feed herself.                                   | Video delivery of decision support tool presented on a computer (lasting 2 minutes).                                                                    | Picture stills of a real patient with advanced dementia (80 year old female) and 2 daughters in a nursing home setting.<br>Video developed in consultation with specialists in dementia and Functional Assessment Staging (FAST) 7a (i.e., criteria for the most advanced stage of dementia). | Verbal information (consultation)<br>versus<br>Decision support video + verbal information (consultation).                                                                      |
| Winterbottom et al. (2011) [5]         | Four scripted scenarios. Two patient and two doctor stories describing haemodialysis (HD) and continuous cycling peritoneal | Written or video delivery delivered after standard factual information about HD and CCPD.<br>In study 2, only video delivery of story plus              | In study 1: 1 male and 1 female actor played 2 roles each.<br>In study 2: 2 male and 2 female actors played each of the 4 roles.<br>Narratives developed from the                                                                                                                             | Study 1: 2x2x2 format (written vs. video) x source (patient vs. doctor) x order (HD information vs. PD information).<br>Study 2: 3x2x2x2: decision table (none, before or after |

|                                |                                                                                                                                                                                                                         |                                                                                 |                                                                                                                                                                                                                                                                                                        |                                                                                                                                                                              |
|--------------------------------|-------------------------------------------------------------------------------------------------------------------------------------------------------------------------------------------------------------------------|---------------------------------------------------------------------------------|--------------------------------------------------------------------------------------------------------------------------------------------------------------------------------------------------------------------------------------------------------------------------------------------------------|------------------------------------------------------------------------------------------------------------------------------------------------------------------------------|
|                                | dialysis (CCPD), decision making process, and dialysis outcome (fitting into a patient's life).                                                                                                                         | additional summary decision-attribute table before or after story.              | literature, study describing patient dialysis decision making, and renal specialists.                                                                                                                                                                                                                  | story) x order (patient vs. doctor first) x sex of patient (male, female) x sex of doctor (male, female). Control group read only basic factual information in both studies. |
| El-Jawahri et al. (2009) [6]   | Three levels of care described, identical to the verbal information (consultation) but with visual images of patients in different scenarios.                                                                           | A 6-minute video presented on a laptop computer.                                | Verbal narrative describing 3 levels of medical care for advanced cancer. Pictures used of patients in intensive care being ventilated by a professional. Video developed in consultation with cancer specialists, filmed without prompts.                                                             | Verbal information (consultation) versus Verbal information (consultation) plus video.                                                                                       |
| Kreuter et al. (2010) [7]      | Both videos addressed 11 key messages about breast cancer. Video 1: personal stories from African American breast cancer survivors. Video 2: didactic, expository form from an African American woman, cancer survivor. | Videos presented via a mobile communication research facility in the community. | Video 1: 57 short stories elicited from 29 cancer survivors. Edited to form narrative about risk, talking about cancer and mammography screening. Video 2: Material developed from video 1 and presented by a single narrator with images, photos, graphics and music. Videos piloted for equivalence. | Narrative video versus Factual prose video.                                                                                                                                  |
| Jibaja-Weiss et al. (2011) [8] | Factual information about surgery options                                                                                                                                                                               | Decision-making process for making a                                            | In the PtDA the storyline does not reveal what surgery option                                                                                                                                                                                                                                          | Intervention: a computerised interactive multimedia PtDA                                                                                                                     |

|                                     |                                                                                                                                                                |                                                                                                                          |                                                                                                                                                                                                                            |                                                                                                                                                                                                                                                                        |
|-------------------------------------|----------------------------------------------------------------------------------------------------------------------------------------------------------------|--------------------------------------------------------------------------------------------------------------------------|----------------------------------------------------------------------------------------------------------------------------------------------------------------------------------------------------------------------------|------------------------------------------------------------------------------------------------------------------------------------------------------------------------------------------------------------------------------------------------------------------------|
|                                     | and other treatments presented in interactive learning modules component of ptDA                                                                               | surgery decision presented in the format of didactic soap operas                                                         | the main character chooses; a values clarification exercise is included.<br>PtDA conforms to IPDAS criteria.                                                                                                               | utilising entertainment (soap opera episodes and interactive learning modules).<br>Control: only usual care.                                                                                                                                                           |
| Volk et al. (2008) [9]              | Factual information about prostate cancer and screening presented in the format of didactic soap operas and interactive learning modules.                      | A computer-based PtDA based on the Edutainment Decision Aid Model (EDAM).                                                | In the PtDA, ethnicity of main character tailored to the viewer; celebrity testimonials and values clarification exercise included.                                                                                        | Intervention: an interactive computer-based PtDA.<br>Control: receive an audio booklet with no values clarification, entertainment component, testimonials, or values-clarification exercise.                                                                          |
| Fagerlin et al. (2005) [10]         | The experience of former patients with each of the treatment options was presented with the scenario.                                                          | Written patient narratives with the number of narratives varied to be representative or non-representative of cure rate. | Information in the narratives was repetition of that presented in the scenario so no new information was supplied in the narratives.<br>Study 1: A pictograph and trade-off quiz were also presented to some participants. | Study 1: 2 (representative vs. non-representative narratives) x 2 (pictograph and quiz vs.. no pictograph or quiz).<br>Study 2: 2 (pictograph vs. no pictograph) x 2 (no trade off quiz vs.. trade off quiz) [all participants received non-representative narratives] |
| Shaffer et al. (in press 2013) [11] | Three topics including patients' reaction to diagnosis; strategies for making the decision; the least and most important aspects of treatment for the patient. | Video clips to supplement factual information talked about by the narrator.                                              | Verbal stories from 12 patients' experiences of treatment for breast cancer. All women were middle-aged, 9 were Caucasian and 3 African-American                                                                           | Video resource versus<br>Video resource plus personal stories                                                                                                                                                                                                          |

## References

1. Dillard AJ, Fagerlin A, Zigmund-Fisher BJ, Ubel PA: **Narratives that address affective forecasting errors reduce perceived barriers to colorectal cancer screening.** *Soc Sci Med* 2010; 71: 45-52.
2. Volandes AE, Paasche-Orlow MK, Barry MJ, Gillick MR, Minaker KL, Chang Y, Cook EF, Abbo ED, El-Jawahri A, Mitchell SL: **Video decision support tool for advance care planning in dementia: randomised controlled trial.** *BMJ* 2009; 338: b2159.
3. Volandes AE, Mitchell SL, Gillick MR; Chang Y, Paasche-Orlow MK: **Using video images to improve the accuracy of surrogate decision making: a randomized controlled trial.** *J Am Med Dir Assoc* 2009b; 10; 575-580.
4. Volandes AE, Ferguson LA, Davis AD, Hull NC, Green MJ, Chang Y, Deep K, Paasche-Orlow MK: **Assessing End-of-Life Preferences for Advanced Dementia in Rural Patients Using an Educational Video: A Randomized Controlled Trial.** *J Palliat Med* February 2011, 14(2): 169-177.
5. Winterbottom AE, Bekker HL, Conner M, Mooney A: **Patient stories about their dialysis experience biases others' choices regardless of doctor's advice: an experimental study.** *Nephrol Dial Transplant* 2011; 27(1): 325-331.
6. El-Jawahri A, Podgurski LM, Eichler AF, Plotkin SR, Temel JS, Mitchell SL, Chang Y, Barry MJ, Volandes AE: **Use of video to facilitate end-of-life discussions with patients with cancer: a randomized controlled trial.** *J Clin Oncol* 2010; 28: 305-311.
7. Kreuter MW, Holmes K, Alcaraz K: **Comparing narrative and informational videos to increase mammography in low-income African American women.** *Patient Educ Counsel* 2010; 81 S1: S6-S14 (2010)

8. Jibaja-Weiss ML, Volk RJ, Granchi TS: **Entertainment education for breast cancer surgery decisions: A randomized trial among patients with low health literacy** *Patient Educ Counsel* 2011; 84: 41-8.
9. Volk RJ, Jibaba-Weiss ML, Hawley ST, Kneuper S, Spann SJ, Miles BJ, Hyman DJ: **Entertainment education for prostate cancer screening: a randomized trial among primary care patients with low health literacy.** *Patient Educ Counsel* 2008; 73:482-489.
10. Fagerlin A, Wang C, Ubel PA: **Reducing the influence of anecdotal reasoning on people's health care decisions: is a picture worth a thousand statistics?** *Med Decis Making* 2005; 25: 398-405.
11. Shaffer VA, Tomek S, Hulsey L: The effect of narrative information in a publicly available patient decision aid for early-stage breast cancer. *Health Commun* 2013 [Epub ahead of print].
