# Supplementary material for: Do personal stories make patient decision aids more effective? A critical review of theory and evidence
Source: BMC Med Inform Decis Mak. 2013 Nov 29;13(Suppl 2):S9. doi: 10.1186/1472-6947-13-S2-S9 (PMC4044102; doi:10.1186/1472-6947-13-S2-S9)
Supplement: Additional file 1 — Table S1: Studies Included in the Review: Methodological Detail [file 1472-6947-13-S2-S9-S1.pdf]

**Table S1. Studies Included in the Review: Methodological Detail**

| <b>Authors, Year, Citation Number</b> | <b>Sample</b>                                                    | <b>Theory</b>                 | <b>Aim</b>                                                                                                                              | <b>Measures</b>                                                                                            |
|---------------------------------------|------------------------------------------------------------------|-------------------------------|-----------------------------------------------------------------------------------------------------------------------------------------|------------------------------------------------------------------------------------------------------------|
| Dillard et al. (2010), [1]            | N = 1533<br>General population, USA                              | Affective forecasting theory  | To assess the use of patient stories in promoting colorectal cancer screening                                                           | Perceived barriers of screening; risk perception; knowledge; screening interest; time spent reading text.  |
| Volandes et al. (2009), [2]           | N = 200<br>General population, USA                               | None stated                   | To assess the use of a video of a patient with advanced dementia on end of life care choices.                                           | Hypothetical end of life care; knowledge and experience of dementia; health literacy; acceptability video. |
| Volandes et al. (2009b), [3]          | 14 pairs of patients and their carer.<br>General population, USA | None stated                   | To compare concordance of preferences among elderly patients and their carers.                                                          | Hypothetical end of life care; knowledge and experience of dementia; health literacy; acceptability video. |
| Volandes et al. (2011), [4]           | N = 76<br>General population, USA                                | None stated                   | To assess the use of a video of a patient with advanced dementia on end of life care choices.                                           | Hypothetical end of life care; knowledge and experience of dementia; health literacy; acceptability video. |
| Winterbottom et al. (2011), [5]       | N = 1694<br>Students, UK                                         | Information processing theory | To assess whether another patient's dialysis story affects people's choices and/or the moderating effect of a decision-attribute table. | Hypothetical decision. Knowledge and experience with kidney disease.                                       |
| El-Jawahri et al. (2009), [6]         | N = 50<br>Patients with                                          | None stated                   | To assess a video of images of patients on three levels of                                                                              | Hypothetical end of life care and CPR; knowledge; certainty with                                           |

|                                 |                                                                                                                    |                                                                    |                                                                                                                              |                                                                                                                                                                                                                                                                                |
|---------------------------------|--------------------------------------------------------------------------------------------------------------------|--------------------------------------------------------------------|------------------------------------------------------------------------------------------------------------------------------|--------------------------------------------------------------------------------------------------------------------------------------------------------------------------------------------------------------------------------------------------------------------------------|
|                                 | malignant glioma (cancer), USA                                                                                     |                                                                    | medical care (life-prolonging, basic, and comfort care) for advanced cancer on comfort care choices.                         | decision; acceptability video.                                                                                                                                                                                                                                                 |
| Kreuter et al. (2010), [7]      | N = 489<br>African-American women from general population, USA                                                     | Information processing and behaviour change theories               | To assess the effects of narrative and informational videos on mammography uptake.                                           | Mammography decision; knowledge and experience breast cancer; medical mistrust; perceived physician recommendation; beliefs about cancer; perceived barriers mammography; perceived risk; acquisition information; reasoning (counter-arguing); talking to family and friends. |
| Jibaja-Weiss et al. (2011), [8] | N = 100<br>Female patients with early stage breast cancer, USA                                                     | Communication theories under the rubric of entertainment-education | To evaluate an entertainment-based decision aid for early stage breast cancer surgery in low health literacy patients.       | Treatment preference; knowledge of breast cancer and treatments; decisional, conflict, satisfaction.                                                                                                                                                                           |
| Volk et al. (2010), [9]         | N = 450<br>(n = 149, low literacy; n = 301, high literacy)<br>Patients eligible for prostate cancer screening, USA | Communication theories under the rubric of entertainment-education | To evaluate an entertainment-based decision aid for prostate cancer screening amongst high and low health literacy patients. | Acceptability and engagement with the PtDA; knowledge of prostate cancer and screening; decisional conflict scale; self-advocacy scale.                                                                                                                                        |
| Fagerlin et al. (2005), [10]    | 1 <sup>st</sup> study,<br>N = 613<br>2 <sup>nd</sup> study,                                                        | Information processing theory                                      | To assess the effect of graphical representations of statistics reduces the influence                                        | Hypothetical treatment decision.                                                                                                                                                                                                                                               |

|                                         |                                       |                                  |                                                                                                                                             |                                                                                                                                                                  |
|-----------------------------------------|---------------------------------------|----------------------------------|---------------------------------------------------------------------------------------------------------------------------------------------|------------------------------------------------------------------------------------------------------------------------------------------------------------------|
|                                         | N = 875<br>General<br>population, USA |                                  | of narrative information on<br>decision making about<br>treatment for angina (surgery/<br>balloon angioplasty).                             |                                                                                                                                                                  |
| Shaffer et al.<br>(in press 2013), [11] | N = 200<br>General<br>Population, USA | Information<br>processing theory | To assess the influence of<br>patient stories on decision<br>making about surgery for<br>early-stage breast cancer and<br>resource utility. | Hypothetical decision; decisional<br>confidence/ certainty; electronic<br>health literacy, numeracy, decision<br>making style; PtDA utility,<br>trustworthiness. |

## References

1. Dillard AJ, Fagerlin A, Zigmund-Fisher BJ, Ubel PA: **Narratives that address affective forecasting errors reduce perceived barriers to colorectal cancer screening.** *Soc Sci Med* 2010; 71: 45-52.
2. Volandes AE, Paasche-Orlow MK, Barry MJ, Gillick MR, Minaker KL, Chang Y, Cook EF, Abbo ED, El-Jawahri A, Mitchell SL: **Video decision support tool for advance care planning in dementia: randomised controlled trial.** *BMJ* 2009; 338: b2159.
3. Volandes AE, Mitchell SL, Gillick MR; Chang Y, Paasche-Orlow MK: **Using video images to improve the accuracy of surrogate decision making: a randomized controlled trial.** *J Am Med Dir Assoc* 2009b; 10; 575-580.
4. Volandes AE, Ferguson LA, Davis AD, Hull NC, Green MJ, Chang Y, Deep K, Paasche-Orlow MK: **Assessing End-of-Life Preferences for Advanced Dementia in Rural Patients Using an Educational Video: A Randomized Controlled Trial.** *J Palliat Med* February 2011, 14(2): 169-177.
5. Winterbottom AE, Bekker HL, Conner M, Mooney A: **Patient stories about their dialysis experience biases others' choices regardless of doctor's advice: an experimental study.** *Nephrol Dial Transplant* 2011; 27(1): 325-331.
6. El-Jawahri A, Podgurski LM, Eichler AF, Plotkin SR, Temel JS, Mitchell SL, Chang Y, Barry MJ, Volandes AE: **Use of video to facilitate end-of-life discussions with patients with cancer: a randomized controlled trial.** *J Clin Oncol.* 2010; 28: 305-311.
7. Kreuter MW, Holmes K, Alcaraz K: **Comparing narrative and informational videos to increase mammography in low-income African American women.** *Patient Educ Counsel* 2010; 81 S1: S6-S14 (2010)

8. Jibaja-Weiss ML, Volk RJ, Granchi TS: **Entertainment education for breast cancer surgery decisions: A randomized trial among patients with low health literacy** *Patient Educ Counsel* 2011; 84: 41-8.
9. Volk RJ, Jibaba-Weiss ML, Hawley ST, Kneuper S, Spann SJ, Miles BJ, Hyman DJ: **Entertainment education for prostate cancer screening: a randomized trial among primary care patients with low health literacy.** *Patient Educ Counsel* 2008; 73:482-489.
10. Fagerlin A, Wang C, Ubel PA: **Reducing the influence of anecdotal reasoning on people's health care decisions: is a picture worth a thousand statistics?** *Med Decis Making*. 2005; 25: 398-405.
11. Shaffer VA, Tomek S, Hulsey L: The effect of narrative Information in a publicly available patient decision aid for early-stage breast cancer. *Health Commun* 2013 Feb 5 [Epub ahead of print].
